# Supplementary material for: Characteristics and Surgical Outcomes of Combat Blast-Related Full-Thickness Traumatic Macular Holes: Insights from War Eye Trauma in Ukraine
Source: Research Square preprint supplement (doi:10.21203/rs.3.rs-8065694/v1), 2025-12-12
Supplement: Supplementary file 1 [file 43d7fdddcd48b7860bf8b74f.docx]

| Cases | Surgery | Macular hole manipulations | Tamponade | Macular Findings | Nonmacular Findings | Hole closure |
| --- | --- | --- | --- | --- | --- | --- |
| Case 1 | PPV+IOL | MIIF + CRD | SO | RRD, VH, RPEA | VH, SC, RRD, SF | Yes |
| Case 2 | PPV | IIP + SIIF + SFA + CRD | SF6 | SF | SRH, SF | Yes |
| Case 3 | PPV | IIP + SIIF + CRD | SO | RRD, VH, SRH, SF, RPEA | VH, RRD, SC | Yes |
| Case 4 | PPV | CIP + FDH | SF6 | N/A | SRH, SF | Yes |
| Case 5 | PPV+IOL | IIP + SIIF + SFA + CRD | C2F6 | N/A | IOFBs, IOFBIS,  SC | Yes |
| Case 6 | PPV | SFA + CRD (for persisting hole)  TIIF (for eccentric iatrogenic hole) | SF6 | RPEP | TON, RPEA | Yes |
| Case 7 | PPV+IOL | IIP + SIIF + SFA + DSA + CRD | SF6 | RPEP | N/A | Yes |
| Case 8 | PPV+IOL | MIIF + SFA + DSA + CRD | C2F6 | RPEP | SC, RPEP | Yes |
| Case 9 | PPV | IIP + SIIF | SF6 | RPEA, SC | VH, SRH, SC | Yes |
| Case 10 | PPV | CIP + FDH | SF6 | VH, RPEP | TC, TM, VH, SRH, SC | Yes |
| Case 11 | PPV | CIP + FDH | SF6 | VH, RPEP | TC, TM, VH, SRH, CS | Yes |
| Case 12 | PPV+IOL | IIP + SIIF + SFA + DSA + CRD | SO | RPEP | SC | Yes |
| Case 13 | PPV+IOL | CIP + FDH | C2F6 | RPEP | SC, SRH | Yes |
| Case 14 | PPV+IOL | IIP + SIIF + CRD | C2F6 | RRD, VH, RPEP | RRD, VH, SC, CH | Yes |

**Abbreviations:** **MIIF** Multilayer Inverted ILM Flaps; **CIP** Circular ILM Peeling; **IIP** Inferior ILM Peeling; **SIIF** Superior Inverted ILM Flap; **TIIF** Temporal Inverted ILM Flap; **FDH** Fluid Drainage through the Hole; **CRD** Centripetal Retinal Displacement; **SFA** Subretinal Fluid Application; **DSA** Dissection of Subretinal Adhesion; **SO** Silicon oil

**IOFB** Intraocular foreign body; **IOFBIS** Intraocular foreign body impact site; **CS** Corneal scar; **TC** Traumatic Cataract; **TM** Traumatic mydriasis; **RRD** Rhegmatogenous retinal detachment; **SC** Sclopeteria; **RPEA** Retinal pigment epithelium atrophy; **RPEP**  Retinal pigment epitheliopathy; **SRH** Subretinal hemorrhage; **SF** Subretinal fibrosis; **VH** Vitreous hemorrhage; **CH** Choroidal hemorrhage; **TON** Traumatic optic neuropathy; **N/A** Nonapplicable.
