# Supplementary material for: Characteristics and Surgical Outcomes of Combat Blast-Related Full-Thickness Traumatic Macular Holes: Insights from War Eye Trauma in Ukraine
Source: Research Square preprint supplement (doi:10.21203/rs.3.rs-8065694/v1), 2025-12-12
Supplement: Supplementary file 2 [file 7a48bc5863b4e8c875e8224e.docx]

| Risk Factors | Visual Acuity ≥ 0.3 | | р-value |
| --- | --- | --- | --- |
| yes | no |
| Days Before Surgery ≤31, yes/no | 5/3 | 1/5 | 0.12 |
| Closed-globe injury, yes/no | 5/3 | 5/1 | 0.41 |
| Ocular Trauma Score ≤ 70, yes/no | 1/7 | 5/1 | 0.02* |
| Sclopetaria, yes/no | 5/3 | 4/2 | 0.66 |
| Ocular Adnexal and Orbital Injuries, yes/no | 5/3 | 4/2 | 0.66 |
| Head, Neck, Face or Systemic Injuries, | 6/2 | 5/1 | 0.62 |
| Preoperative BCVA ≥0.1 decimal, yes/no | 3/5 | 6/0 | 0.03* |
| Minimum Diameter Macular Holes <400, yes/no ** | 0/9 | 3/2 | 0.03* |
| Tamponade Gas, yes/no | 7/1 | 4/2 | 0.39 |
| Retinal Detachment, yes/no | 1/7 | 2/4 | 0.39 |

Note: * - Fisher's Exact Test was used, one-tailed association.

** - For Postoperative Visual Acuity greater than 0.3
