# Supplementary material for: Characteristics and Surgical Outcomes of Combat Blast-Related Full-Thickness Traumatic Macular Holes: Insights from War Eye Trauma in Ukraine
Source: Research Square preprint supplement (doi:10.21203/rs.3.rs-8065694/v1), 2025-12-12
Supplement: Supplementary file 3 [file afddf456906f483b773e138f.docx]

| Variables | Value |
| --- | --- |
| Macular hole closed after PPV, n/N (P ± 95% CI) | 14/14 (100 ± 21.5) |
| Phacoemulsification + IOL in combination with PPV, n/N (P ± 95% CI) | 7/14 (50.0 ± 27.2) |
| Tamponade, n/N (P ± 95% CI):  Silicon oil  Gas | 3/14 (21.4 ± 22.3)  11/14 (78.6 ± 22.3) |
| BCVA (decimal), at 1 month, median (IQR) | 0.3 (0.14 – 0.40) * |
| BCVA logMAR at 1 month, median (IQR) | 0.5 (0.4 – 0.9) * |
| Follow-up duration, days, median (IQR) | 75 (43 – 175) |
| Intraoperative complications, n/N (P ± 95CI%):  Transitory arterial occlusion  Retinal tear  Preretinal haemorrhage | 3/14 (21.4 ± 22.3)  1/14 (7.1 ± 14.0)  1/14 (7.1 ± 14.0)  1/14 (7.1 ± 14.0) |
| Postoperative complications, n/N (P ± 95CI%):  Retinal detachment  ILM flap proliferation  Vitreous hemorrhage  IOL subluxation  Persistent IOP elevation  Endophthalmitis | 1/14 (7.1 ± 14.0)  0/14 (0 ± 21.5)  1/14 (7.1 ± 14.0)  0/14 (0 ± 21.5)  0/14 (0 ± 21.5)  0/14 (0 ± 21.5)  0/14 (0 ± 21.5) |

Note: * - visual acuity after surgery is statistically significantly (p = 0.001) different from preoperative values, Wilcoxon signed-rank test W = 3,3.

Abbreviation: N - sample size; n - quantity of patients; (P ± 95CI%) - frequency and 95 percent confidence interval; IQR - interquartile range (25 – 75%).
