# Supplementary material for: Characteristics and Surgical Outcomes of Combat Blast-Related Full-Thickness Traumatic Macular Holes: Insights from War Eye Trauma in Ukraine
Source: Research Square preprint supplement (doi:10.21203/rs.3.rs-8065694/v1), 2025-12-12
Supplement: Supplementary file 4 [file f1c6221c5c80445937b9685c.docx]

| Variables | Value |
| --- | --- |
| Age, years, median (IQR) | 32 (25.5 – 43.0) |
| Operated eye, n/N (P ± 95CI%):  Right  Left | 7/14 (50 ± 27.2)  7/14 (50 ± 27.2) |
| Type of Globe injury, n/N (P ± 95CI%):  Open-globe  Closed-globe | 4/14 (28.6 ± 24.6)  10/14 (71.4 ± 24.6) |
| Association of ocular trauma with ocular adnexal and orbital injuries, n/N (P ± 95% CI) | 9/14 (64.3 ± 26.0) |
| Association of ocular trauma with other head, neck, face or systemic injuries, n/N (P ± 95% CI) | 11/14 (78.6 ± 22.3) |
| Retinal Detachment, n/N (P ± 95% CI) | 3/14 (21.4 ± 22.3) |
| The median time from the moment of injury, days, median (IQR) | 41 (19 – 71) |
| Binocular Macular Hole, n/N (P ± 95% CI) | 1/13 (7.6 ± 14.0) |
| Ocular Trauma Score, median (IQR) | 68 (56 – 75) |
| Preoperative BCVA decimal, median (IQR) | 0.07 (0.02 – 0.10) |
| Preoperative BCVA logMAR, median (IQR) | 1.2 (1.0 – 1.8) |
| Minimum Linear Diameter (μm), median (IQR):  <400 μm, n/N (P ± 95CI%)  400 – 600 μm, n/N (P ± 95CI%)  >600 μm, n/N (P ± 95CI%) | 682 (532 – 889)  2/14 (14.3 ± 19.0)  3/14 (21.4 ± 22.3)  9/14 (64.3 ± 26.0) |

Abbreviation: N - sample size; n - number of patients; (P ± 95CI%) - frequency and 95 percent confidence interval; IQR - interquartile range (25–75%).
